# Supplementary material
Source: publisher figshare collection journal article supplement (https://frontiersin.figshare.com/ndownloader/files/34040312)
Supplement: Supplementary file 1 [file 34040312]

## Sheet: eDNA water samples
Date (month/day/year)	Tube ID	Volume (L)	Latitude	Longitude	Collect Time
2018-07-30	OGW-003	1	40.5722	-72.7205	12:34:00
2018-07-30	OGW-004	1	40.5727	-72.7213	12:40:00
2018-07-30	OGW-005	1	40.574	-72.7271	12:54:00
2018-07-30	OGW-006	1	40.5726	-72.7165	13:19:00
2018-08-27	OGW-012	1	40.5903	-73.3139	09:04:00
2019-06-17	OGW-071	1	40.538	-73.8374	15:53:00
2019-06-17	OGW-073	1	40.538	-73.8374	16:12:00
2019-06-17	OGW-074	1	40.536	-73.8456	16:19:00
2019-06-17	OGW-075	1	40.538	-73.8373	16:24:00
2019-06-17	OGW-076	1	40.5359	-73.8457	16:29:00
2019-07-10	OGW-091	1	40.5031	-74.1081	14:35:00
2019-07-10	OGW-092	1	40.5033	-74.1081	14:47:00
2019-07-10	OGW-093	1	40.5032	-74.108	14:59:00
2019-07-10	OGW-094	1	40.5036	-74.1114	14:54:00
2019-07-10	OGW-095	1	40.5037	-74.1116	15:10:00
2019-07-10	OGW-096	1	40.5037	-74.1115	nr
2019-08-08	OGW-109	1	40.5254	-74.0755	10:26:00
2019-08-08	OGW-110	1	40.5254	-74.0755	10:42:00
2019-08-08	OGW-111	1	40.5258	-74.0798	10:37:00
2019-08-08	OGW-112	1	40.5258	-74.0798	10:54:00
2019-08-08	OGW-113	1	40.5255	-74.0754	10:59:00
2019-08-08	OGW-114	1	40.5258	-74.0798	11:10:00
2019-08-20	OGW-121	1	40.4127	-73.9087	13:28:00
2019-08-20	OGW-122	1	40.4129	-73.9084	13:46:00
2019-08-08	OGW-123	1	40.4129	-73.9084	13:46:00
2019-08-20	OGW-124	1	40.413	-73.9087	14:03:00
2019-08-20	OGW-125	1	40.413	-73.9087	14:03:00
2019-08-23	OGW-126	1	40.556	-73.6472	13:13:00
2019-08-23	OGW-127	1	40.556	-73.6472	13:29:00
2019-08-23	OGW-128	1	40.556	-73.6472	13:44:00
2019-08-23	OGW-130	1	40.4434	-73.917	15:32:00
2019-08-23	OGW-132	1	40.4428	-73.9165	16:02:00
2019-08-23	OGW-133	1	40.4259	-73.928	16:27:00
2019-08-23	OGW-134	1	40.4259	-73.928	16:42:00
2019-08-23	OGW-135	1	40.4259	-73.928	16:57:00
2019-09-03	OGW-148	1	40.5605	-73.8149	11:12:00
2019-09-03	OGW-149	1	40.5595	-73.8173	11:16:00
2019-09-03	OGW-150	1	40.5605	-73.8149	11:27:00
2019-09-03	OGW-151	1	40.5595	-73.8172	11:31:00
2019-09-03	OGW-152	1	40.5605	-73.8149	11:42:00
2019-09-03	OGW-153	1	40.5595	-73.8172	11:46:00
2019-09-03	OGW-154	1	40.5474	-73.8502	12:17:00
2019-09-03	OGW-155	1	40.5474	-73.8502	12:32:00
2019-09-03	OGW-156	1	40.5475	-73.8503	12:48:00
2019-09-03	OGW-158	1	40.4924	-73.635	14:07:00
2019-09-03	OGW-159	1	40.4924	-73.635	14:23:00
2019-09-03	OGW-160	1	40.4924	-73.6349	14:38:00
2019-09-16	OGW-162	1	40.3623	-73.8456	13:22:00
2019-09-16	OGW-163	1	40.3623	-73.8456	13:22:00
2019-09-16	OGW-164	1	40.3623	-73.8456	13:41:00
2019-09-16	OGW-165	1	40.3623	-73.8455	13:53:00
2019-09-16	OGW-166	1	40.2144	-73.9624	15:16:00
2019-09-16	OGW-167	1	40.2146	-73.9625	15:32:00
2019-09-16	OGW-168	1	40.2144	-73.9623	15:45:00
2019-09-21	OGW-170	1	40.4204	-73.9286	09:58:00
2019-09-27	OGW-178	1	40.559	-73.7794	11:35:00
2019-09-27	OGW-179	1	40.557	-73.7829	11:39:00
2019-09-27	OGW-180	1	40.5573	-73.789	11:45:00
2019-09-27	OGW-181	1	40.5591	-73.7794	11:52:00
2019-09-27	OGW-182	1	40.557	-73.783	11:56:00
2019-09-27	OGW-183	1	40.5573	-73.7892	12:02:00
2019-09-27	OGW-184	1	40.559	-73.7794	12:08:00
2019-09-27	OGW-185	1	40.557	-73.783	12:11:00
2019-09-27	OGW-186	1	40.5572	-73.7892	12:18:00
2019-09-27	OGW-187	1	40.529	-73.8761	13:19:00
2019-09-27	OGW-188	1	40.529	-73.8762	13:35:00
2019-09-27	OGW-189	1	40.5291	-73.8762	13:50:00
2019-09-27	OGW-190	1	40.5192	-73.8581	14:39:00
2019-09-27	OGW-191	1	40.5192	-73.8581	14:54:00
2019-09-27	OGW-192	1	40.5192	-73.8581	15:09:00
